# Supplementary material
Source: ML conference proceedings conference paper supplement (https://proceedings.neurips.cc/paper_files/paper/2020/hash/abd987257ff0eddc2bc6602538cb3c43-Abstract.html)
Supplement: Supplementary file [file abd987257ff0eddc2bc6602538cb3c43-Supplemental.pdf]

341 **Supplementary Material for "Adaptive Experimental Design with**  
 342 **Temporal Interference: A Maximum Likelihood Approach"**

343 **A An Example: Cooperative Exploration**

344 Throughout this section, we refer to the two Markov chains depicted in Figure 1. The state space  
 345 for both chains is  $S = \{1, \dots, s\}$ , where  $s > 1$ . The red chain corresponds to  $\ell = 1$  and the blue  
 346 chain corresponds to  $\ell = 2$ . The transition probabilities are as depicted in the figure. In particular,  
 347 we assume that chain 1 has  $P(x, x + 1) = P(s, 1) = 1$  for  $x = 1, \dots, s - 1$ , and chain 2 has  
 348  $P(x, x - 1) = P(1, s) = 1$  for  $x = 2, \dots, s$ .

349 We assume the experimenter *knows* the transition matrices exactly (as they are deterministic), and  
 350 thus the only uncertainty in estimating the reward distribution comes from uncertainty regarding  
 351 the reward distribution of each chain. We assume each chain *only* earns a reward in state 1. In  
 352 particular, chain  $\ell$  earns a reward that is Bernoulli( $q(\ell)$ ) in state 1, for some unknown parameter  $q(\ell)$   
 353 with  $0 < q(\ell) < 1$ . Clearly the stationary distribution of each chain is  $\pi(\ell, x) = 1/s$ , and so the  
 354 steady state mean reward of each chain is  $\alpha(\ell) = q(\ell)/s$ . Thus the treatment effect is  $(q(2) - q(1))/s$ .

355 First, suppose that for  $\ell = 1, 2$  we wanted to estimate only  $\alpha(\ell)$  by running chain  $\ell$ , i.e.,  $A_n = \ell$  for  
 356 all  $n$ . Then note that in every  $S$  steps, only one observation is received of the reward in state 1. Let  
 357  $\hat{\alpha}_n(\ell)$  denote the maximum likelihood estimate of steady state reward obtained from the first  $n$  steps.  
 358 Given the structure of this chain, it is straightforward to check that the MLE at time  $n > s$  reduces to  
 359 the sample average of  $\lfloor n/s \rfloor$  independent Bernoulli( $q(\ell)$ ) samples. This estimator has variance that  
 360 scales as  $\Theta(s/n)$ . Thus, any attempt at estimation of the variance of steady state reward by running  
 361 each chain in isolation will have variance that scales with  $s$ .

362 On the other hand, now suppose we use the following sampling policy: the policy always samples  
 363 chain 1 when in state  $s$ ; the policy always samples chain 2 in states  $2, \dots, s - 1$ ; and in successive  
 364 visits to state 1, the policy deterministically alternates between sampling chains 1 and 2. Suppose  
 365 for simplicity that this chain starts at  $X_0 = 1$ . Then in every four periods, this chain obtains one  
 366 independent sample each of a reward from chain 1 in state 1 (i.e., Bernoulli( $q(1)$ )), and a reward from  
 367 chain 2 in state 1 (i.e., Bernoulli( $q(2)$ )). Thus the maximum likelihood estimator of  $\alpha(\ell)$  will have  
 368 variance that scales as  $\Theta(4/n)$ , and in particular, does *not* grow with  $s$ . In particular, the improvement  
 369 in variance under this policy relative to the preceding approach can be made unboundedly large by  
 370 increasing  $s$ .

371 This example illustrates the surprising insight that by *cooperatively exploring* using *both* chains  
 372 together, substantial benefits in estimation variance can be achieved relative to the variance of  
 373 estimation with each chain in isolation. In this example, both approaches to estimation will be  
 374 consistent. However, the state-dependent sampling policy leads to a substantial reduction in variance,  
 375 because it benefits from cooperative exploration: for each chain  $\ell = 1, 2$ , the *other* chain is used to  
 376 drive the system back to where samples are most needed to reduce variance. By contrast, running  
 377 each chain in isolation forces the experimenter to wait  $s$  time steps between successive observations  
 378 of the random reward in state 1. When  $s$  becomes larger, the long run average time spent in state  
 379 1 approaches  $1/2$  for the state-dependent sampling policy, but approaches zero for either chain in  
 380 isolation.

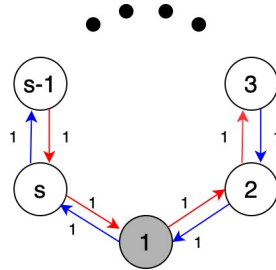

Figure 1: The two Markov chains described in Appendix A. Chain 1 is red, and chain 2 is blue. Rewards are only earned in state 1 for each chain; in particular, the reward distribution in state 1 is Bernoulli( $q(\ell)$ ) for chain  $\ell$ .

381 **B Proofs: Section 4**

382 **Proof of Proposition 4.** Relations (18) and (19) are obvious. As for (17), note that

$$\frac{1}{n}\Gamma_n(1, y) + \frac{1}{n}\Gamma_n(2, y) \quad (37)$$

$$= \frac{1}{n} \sum_{j=0}^{n-1} I(X_j = y) \quad (38)$$

$$= \frac{1}{n} \sum_{j=1}^n I(X_j = y) + \frac{1}{n}(I(X_0 = y) - I(X_n = y)) \quad (39)$$

$$= \frac{1}{n} \sum_{j=1}^n I(X_j = y) + O_p\left(\frac{1}{n}\right) \quad (40)$$

$$= \sum_{\ell=1}^2 \sum_{x \in S} \frac{1}{n} \sum_{j=1}^n I(X_{j-1} = x, A_{j-1} = \ell, X_j = y) + O_p\left(\frac{1}{n}\right) \quad (41)$$

$$= \sum_{\ell=1}^2 \sum_{x \in S} \frac{1}{n} \Gamma_n(\ell, x) P(\ell, x, y) \quad (42)$$

$$+ \sum_{\ell=1}^2 \sum_{x \in S} \left\{ \frac{1}{n} \sum_{j=1}^n I(X_{j-1} = x, A_{j-1} = \ell) [I(X_j = y) - P(\ell, x, y)] \right\} + O_p\left(\frac{1}{n}\right). \quad (43)$$

383 (Here we use the notation that  $f(n) = O_p(1/n)$  to denote stochastic boundedness of  $nf(n)$ : for all  
384  $\epsilon > 0$ , there exists deterministic  $M$  such that  $P(|nf(n)| > M) < \epsilon$  for all  $n$ .)

385 Let  $W_j = I(X_{j-1} = x, A_{j-1} = \ell) [I(X_j = y) - P(\ell, x, y)]$ . This is a martingale difference  
386 sequence adapted to  $\mathcal{G}_j$ . In particular, as a result the  $W_j$  are *orthogonal* in the sense that for  $j < k$ ,  
387 there  $E\{W_j W_k\} = 0$ . (This result follows by conditioning on  $\mathcal{G}_j$  and nesting conditional expectations:  
388  $E\{W_j W_k\} = E\{E\{W_k | \mathcal{G}_j\} W_j\} = 0$ .) Using orthogonality of the martingale differences implies  
389 that

$$E \left\{ \left( \frac{1}{n} \sum_{j=1}^n I(X_{j-1} = x, A_{j-1} = \ell) [I(X_j = y) - P(\ell, x, y)] \right)^2 \right\} \quad (44)$$

$$= E \left\{ \frac{1}{n^2} \Gamma_n(\ell, x) (P(\ell, x, y) - P^2(\ell, x, y)) \right\} \rightarrow 0 \quad (45)$$

390 as  $n \rightarrow \infty$ . Therefore, by Chebyshev's inequality

$$\frac{1}{n} \sum_{j=1}^n I(X_{j-1} = x, A_{j-1} = \ell) [I(X_j = y) - P(\ell, x, y)] \xrightarrow{P} 0 \quad (46)$$

391 as  $n \rightarrow \infty$ . Taking the limits in (43) yields (17). ■

392 **Proof of Proposition 6.** We start by proving (22). We recall that

$$\hat{P}_n(\ell, x, y) = \frac{\sum_{j=0}^{n-1} I(X_j = x, A_j = \ell, X_{j+1} = y)}{\max\{\Gamma_n(\ell, x), 1\}} \quad (47)$$

393 As in the proof of Proposition 4,

$$\frac{1}{n} \sum_{j=0}^{n-1} I(X_j = x, A_j = \ell, X_{j+1} = y) \quad (48)$$

$$= \left\{ \frac{1}{n} \sum_{j=0}^{n-1} I(X_j = x, A_j = \ell) [I(X_{j+1} = y) - P(\ell, x, y)] \right\} + \frac{1}{n} \Gamma_n(\ell, x) P(\ell, x, y) \quad (49)$$

394 Therefore,

$$\hat{P}_n(\ell, x, y) = \frac{\left\{ \frac{1}{n} \sum_{j=0}^{n-1} I(X_j = x, A_j = \ell) [I(X_{j+1} = y) - P(\ell, x, y)] \right\}}{\frac{1}{n} \max\{\Gamma_n(\ell, x), 1\}} \quad (50)$$

$$+ \frac{\Gamma_n(\ell, x)}{\max\{\Gamma_n(\ell, x), 1\}} P(\ell, x, y) \quad (51)$$

$$= \frac{o_p(1)}{\frac{1}{n} \max\{\Gamma_n(\ell, x), 1\}} + \frac{\Gamma_n(\ell, x)}{\max\{\Gamma_n(\ell, x), 1\}} P(\ell, x, y) \quad \text{from (46)} \quad (52)$$

$$\xrightarrow{P} P(\ell, x, y) \quad (53)$$

395 as  $n \rightarrow \infty$ , where the convergence in (53) holds because  $\gamma(\ell, x)$  are almost surely positive.

396 We now prove (23). Let  $\mu_n$  denote the law of  $\hat{\pi}_n$ , and view it as a probability measure on vectors  
 397 in the probability simplex on the state space  $S$ , denoted  $\Delta(S)$ . The set  $\Delta(S)$  is compact, and so by  
 398 Prohorov's theorem there exists a deterministic subsequence  $n_k$  such that  $\mu_{n_k}$  converges weakly to  
 399 a probability measure  $\mu$  on  $\Delta(S)$ , with associated random variable  $\pi'(\ell)$ . Since  $\hat{P}_n(\ell) \xrightarrow{P} P(\ell)$  by  
 400 (53), and  $P(\ell)$  is deterministic, it follows by Slutsky's theorem that:

$$\hat{\pi}_{n_k}(\ell) \hat{P}_{n_k}(\ell) \Rightarrow \pi'(\ell) P(\ell).$$

401 Since the policy limits are almost surely positive,  $J$  is almost surely finite. Thus, for all sufficiently  
 402 large  $k$  there holds  $\hat{\pi}_{n_k}(\ell) \hat{P}_{n_k}(\ell) = \hat{\pi}_{n_k}(\ell)$ . It follows that  $\pi'(\ell) = \pi'(\ell) P(\ell)$ , so that  $\pi'(\ell) = \pi(\ell)$   
 403 almost surely. In other words, the measure  $\mu$  is the Dirac measure that places probability one on  $\pi(\ell)$ .  
 404 Since this is the case for every convergent subsequence of  $\{\mu_n\}$ , we conclude that  $\hat{\pi}_n(\ell) \Rightarrow \pi(\ell)$ .  
 405 Since  $\pi(\ell)$  is deterministic, we conclude that  $\pi_n(\ell) \xrightarrow{P} \pi(\ell)$  as  $n \rightarrow \infty$ , as required. ■

406 **Proof of Corollary 7.** Since the policy limits of  $A$  are almost surely positive, it is straightforward to  
 407 show that for each  $\ell, x$ ,  $\hat{r}_n(\ell, x) \xrightarrow{P} r(\ell, x)$  as  $n \rightarrow \infty$ . The result then follows from Proposition 6. ■

## 408 C Proofs: Section 5

409 **Proof of Theorem 9.** We begin by showing that for  $\ell = 1, 2$  and  $n \geq J$ , there holds:

$$(\hat{\pi}_n(\ell) - \pi(\ell)) r(\ell) = \hat{\pi}_n(\ell) (\hat{P}_n(\ell) - P(\ell)) \tilde{g}(\ell). \quad (54)$$

410 To see this, observe that for  $n \geq J$ ,

$$\hat{\pi}_n(\ell) - \pi(\ell) = \hat{\pi}_n \hat{P}_n(\ell) - \hat{\pi}_n(\ell) P(\ell) + \hat{\pi}_n(\ell) P(\ell) - \pi(\ell) P(\ell) \quad (55)$$

411 so rearranging the terms we get,

$$(\hat{\pi}_n(\ell) - \pi(\ell)) (I - P(\ell)) = \hat{\pi}_n(\ell) (\hat{P}_n(\ell) - P(\ell)). \quad (56)$$

412 Because  $\Pi(\ell)$  has identical elements down each column,

$$(\hat{\pi}_n(\ell) - \pi(\ell)) \Pi(\ell) = 0, \quad (57)$$

413 and hence

$$(\hat{\pi}_n(\ell) - \pi(\ell)) (I - P(\ell) + \Pi(\ell)) = \hat{\pi}_n(\ell) (\hat{P}_n(\ell) - P(\ell)). \quad (58)$$

414 Recall that we defined  $\tilde{g}(\ell) = (I - P(\ell) + \Pi(\ell))^{-1} r(\ell)$ ; thus

$$(\hat{\pi}_n(\ell) - \pi(\ell)) r(\ell) = \hat{\pi}_n(\ell) (\hat{P}_n(\ell) - P(\ell)) \tilde{g}(\ell), \quad (59)$$

415 as desired.

416 Now for  $\ell = 1, 2$ , and  $x \in S$ , define

$$r(\ell, x, y) = \int_{\mathbb{R}} z F(dz, x, y, \ell). \quad (60)$$

417 Recall that  $\hat{\alpha}_n = \hat{\pi}_n(2)\hat{r}_n(2) - \hat{\pi}_n(1)\hat{r}_n(1)$ . We can write:

$$\hat{\pi}_n(\ell)\hat{r}_n(\ell) - \pi(\ell)r(\ell) \quad (61)$$

$$= (\hat{\pi}_n(\ell) - \pi(\ell))r(\ell) + \hat{\pi}_n(\ell)(\hat{r}_n(\ell) - r(\ell)) \quad (62)$$

$$= \hat{\pi}_n(\ell)(\hat{P}_n(\ell) - P(\ell))\tilde{g}(\ell) + \hat{\pi}_n(\ell)(\hat{r}_n(\ell) - r(\ell)) \quad (63)$$

$$= \sum_{x \in S} \hat{\pi}_n(\ell, x) \frac{\sum_{j=1}^n I(X_{j-1} = x, A_{j-1} = \ell) [\tilde{g}(\ell, X_j) - (P(\ell)\tilde{g}(\ell))(X_{j-1})]}{\max\{\Gamma_n(\ell, x), 1\}} \\ + \sum_{x \in S} \hat{\pi}_n(\ell, x) \frac{\sum_{j=0}^{n-1} I(X_j = x, A_j = \ell) (R_{j+1} - r(\ell, x))}{\max\{\Gamma_n(\ell, x), 1\}} \quad (64)$$

$$= \sum_{x \in S} \hat{\pi}_n(\ell, x) \frac{\sum_{j=1}^n D_j(\ell, x)}{\max\{\Gamma_n(\ell, x), 1\}} \quad (65)$$

418 where

$$D_j(\ell, x) := I(X_{j-1} = x, A_{j-1} = \ell) [\tilde{g}(\ell, X_j) - (P(\ell)\tilde{g}(\ell))(X_{j-1}) + R_j - r(\ell, X_{j-1})]. \quad (66)$$

419 Note that for each  $\ell, x$ ,  $D_j(\ell, x)$  is a martingale difference sequence adapted to  $\mathcal{G}_j$ .

420 For deterministic  $w(\ell) = (w(\ell, x) : x \in S)$ ,  $\ell = 1, 2$ , consider

$$T_n = \frac{1}{\sqrt{n}} \sum_{j=1}^n \sum_{\ell=1}^2 \sum_{x \in S} D_j(\ell, x) w(\ell, x) \quad (67)$$

$$\triangleq \frac{1}{\sqrt{n}} \sum_{j=1}^n D_j, \quad (68)$$

421 where

$$D_j = \sum_{\ell=1}^2 \sum_{x \in S} D_j(\ell, x) w(\ell, x). \quad (69)$$

422 The  $D_j$ 's are martingale differences adapted to  $(\mathcal{G}_j : j \geq 0)$ . Since they are bounded by  
423  $2 \max\{|\tilde{g}(\ell, x)| : x \in S, \ell = 1, 2\} < \infty$  (since  $r(\ell, x)$  is finite), the following conditional Lin-  
424 deberg's condition holds (Eq. (3.7) of [10]):

$$\text{for all } \epsilon > 0, \quad \sum_{j=1}^n \frac{1}{n} E\{D_j^2 I(|D_j| > \epsilon) | \mathcal{G}_{j-1}\} \xrightarrow{p} 0. \quad (70)$$

425 Furthermore,

$$\frac{1}{n} \sum_{j=1}^n E\{D_j^2 | \mathcal{G}_{j-1}\} = \frac{1}{n} \sum_{\ell=1}^2 \sum_{x \in S} \sum_{j=0}^{n-1} I(X_j = x, A_j = \ell) \sigma^2(\ell, x) w^2(\ell, x) \quad (71)$$

$$= \sum_{\ell=1}^2 \sum_{x \in S} \sigma^2(\ell, x) w^2(\ell, x) \frac{\Gamma_n(\ell, x)}{n} \quad (72)$$

$$\xrightarrow{p} \sum_{\ell=1}^2 \sum_{x \in S} \sigma^2(\ell, x) w^2(\ell, x) \gamma(\ell, x) \triangleq \eta^2, \quad (73)$$

426 since  $A$  is assumed to be a TAR policy. We therefore conclude that (by Corollary (3.1) of [10])

$$T_n \Rightarrow \sum_{\ell=1}^2 \sum_{x \in S} \sigma(\ell, x) w(\ell, x) \sqrt{\gamma(\ell, x)} G(\ell, x) \quad (\text{stably}) \quad (74)$$

427 as  $n \rightarrow \infty$ .<sup>3</sup>

428 Stable weak convergence implies that the following convergence of characteristic functions holds as  
429 well:

$$E \left\{ \exp \left( iT_n + i \sum_{\ell=1}^2 \sum_{x \in S} \tilde{w}(\ell, x) \gamma(\ell, x) \right) \right\} \quad (75)$$

$$\rightarrow E \left\{ \exp \left( i \sum_{\ell=1}^2 \sum_{x \in S} w(\ell, x) G(\ell, x) \sigma(\ell, x) \sqrt{\gamma(\ell, x)} + i \sum_{\ell=1}^2 \sum_{x \in S} \tilde{w}(\ell, x) \gamma(\ell, x) \right) \right\} \quad (76)$$

430 as  $n \rightarrow \infty$ , for any deterministic choice of  $\tilde{w}(\ell) = (\tilde{w}(\ell, x) : x \in S), j = 1, 2$ . The Cramer-Wold  
431 device therefore implies that

$$\left( \frac{\sum_{j=1}^n D_j(\ell, x)}{\sqrt{n}}, \gamma(\ell, x) : x \in S, \ell = 1, 2 \right) \Rightarrow \left( \sigma(\ell, x) \sqrt{\gamma(\ell, x)} G(\ell, x), \gamma(\ell, x) : x \in S, \ell = 1, 2 \right) \quad (77)$$

432 as  $n \rightarrow \infty$ . Consequently, since the  $\gamma(\ell, x)$ 's are almost surely positive,

$$\left( \frac{\sum_{j=1}^n D_j(\ell, x)}{\sqrt{n\gamma(\ell, x)}} : x \in S, \ell = 1, 2 \right) \Rightarrow \left( \frac{\sigma(\ell, x) G(\ell, x)}{\sqrt{\gamma(\ell, x)}} : x \in S, \ell = 1, 2 \right) \quad (78)$$

433 as  $n \rightarrow \infty$ . Because  $\frac{\Gamma_n(\ell, x)}{n\gamma(\ell, x)} \xrightarrow{p} 1$  as  $n \rightarrow \infty$ , Slutsky's lemma implies that

$$\sqrt{n} \left( \frac{\sum_{j=1}^n D_j(\ell, x)}{\Gamma_n(\ell, x)} : x \in S, \ell = 1, 2 \right) \quad (79)$$

$$\Rightarrow \left( \frac{\sigma(\ell, x) G(\ell, x)}{\sqrt{\gamma(\ell, x)}} : x \in S, \ell = 1, 2 \right) \quad (80)$$

434 as  $n \rightarrow \infty$ . Finally, Result 2, (80), and another application of Slutsky's lemma imply that

$$\sqrt{n} \left[ \sum_{x \in S} \hat{\pi}_n(1, x) \frac{\sum_{j=1}^n D_j(1, x)}{\Gamma_n(1, x)} - \sum_{x \in S} \pi_n(2, x) \frac{\sum_{j=1}^n D_j(2, x)}{\Gamma_n(2, x)} \right] \quad (81)$$

$$\Rightarrow \sum_{x \in S} \frac{\pi(1, x) \sigma(1, x) G(1, x)}{\sqrt{\gamma(1, x)}} - \sum_{x \in S} \frac{\pi(2, x) \sigma(2, x) G(2, x)}{\sqrt{\gamma(2, x)}} \quad (82)$$

435 as  $n \rightarrow \infty$ , proving the Theorem. ■

436 **Proof of Corollary 10.** Note that the Skorohod representation theorem together with Fatou's lemma  
437 applied to (29) yields the following:

$$\liminf_{n \rightarrow \infty} n \text{Var}(\hat{\alpha}_n - \alpha) \geq \sum_{\ell=1,2} \sum_{x \in S} \pi^2(\ell, x) \sigma^2(\ell, x) E \left\{ \frac{1}{\gamma(\ell, x)} \right\}. \quad (83)$$

438 Using Jensen's inequality on the right hand side of (83), we obtain the result in (30), as required.  
439 (Note that  $E\{\gamma(\ell, x)\} > 0$  for all  $\ell, x$  since we assumed the policy limits are almost surely positive.)

440 ■

441 **Proof of Corollary 11.**

442 First we show the following limits hold:

$$\lim_{n \rightarrow \infty} E \left\{ \sup_{\ell=1,2; x \in S} \left| \frac{\hat{\pi}_n(\ell, x)}{\max\{\Gamma_n(\ell, x), 1\}/n} - \frac{\pi(\ell, x)}{\gamma(\ell, x)} \right| \right\} = 0; \quad (84)$$

$$\lim_{n \rightarrow \infty} E \left\{ \sup_{\ell=1,2; x \in S} \left| \frac{\hat{\pi}_n(\ell, x)}{\max\{\Gamma_n(\ell, x), 1\}/n} - \frac{\pi(\ell, x)}{\gamma(\ell, x)} \right|^2 \right\} = 0. \quad (85)$$

<sup>3</sup>If a sequence of random variables  $Y_n$  on a probability space  $(\Omega, \mathcal{F}, P)$  converges weakly to  $Y$ , we say the convergence is *stable* if for all continuity points  $y$  of the cumulative distribution function of  $Y$  and for all measurable events  $E$ , the limit  $\lim_{n \rightarrow \infty} P(\{Y_n \leq y\} \cap E) = Q_y(E)$  exists, and if  $Q_y(E) \rightarrow P(E)$  as  $y \rightarrow \infty$ .

443 We know from Proposition 6 that  $\hat{\pi}_n \xrightarrow{P} \pi_n$  for all  $\ell, x$ . Further, we know from the definition of policy  
 444 limits that  $\Gamma(\ell, x)/n \xrightarrow{P} \gamma(\ell, x)$  for all  $\ell, x$ . Thus the vector  $(\hat{\pi}_n, \Gamma_n/n)$  converges in probability to  
 445 the vector  $(\pi, \gamma)$ . Use the Skorohod representation theorem to construct a joint probability space on  
 446 which these limits hold almost surely. Then note that each of the terms inside the expectations are  
 447 bounded in (84)-(85), so the desired results hold by the bounded convergence theorem.

448 For the next steps, we use the same definitions as in the proof of Theorem 9, and refer the reader there  
 449 for the relevant notation. In particular, we define  $D_j(\ell, x)$  as in that proof, and use the relationship in  
 450 (65). We make the following two definitions:

$$Y_n(\ell) = \hat{\pi}_n(\ell)\hat{r}_n(\ell) - \pi(\ell)r(\ell) = \sum_{j=1}^n \sum_{x \in S} \frac{\hat{\pi}_n(\ell, x)}{\max\{\Gamma_n(\ell, x), 1\}/n} \cdot \frac{D_j(\ell, x)}{n};$$

$$Z_n(\ell) = \sum_{j=1}^n \sum_{x \in S} \frac{\pi(\ell, x)}{\gamma(\ell, x)} \cdot \frac{D_j(\ell, x)}{n}.$$

451 Note that  $\hat{\alpha}_n - \alpha = Y_n(2) - Y_n(1)$ . The main remaining step in our proof is to show that we can  
 452 compute the scaled asymptotic variance of  $Z_n(2) - Z_n(1)$ , and to use this to upper bound the scaled  
 453 asymptotic variance of  $Y_n(2) - Y_n(1)$ .

454 We now show the following limit holds:

$$\lim_{n \rightarrow \infty} \text{Var}(\sqrt{n}(Z_n(2) - Z_n(1))) = \sum_{x \in S} \frac{\pi^2(\ell, x)\sigma^2(\ell, x)}{\gamma(\ell, x)}. \quad (86)$$

455 Observe that  $Z_n(\ell)$  is a weighted sum of martingale differences; thus we use orthogonality of  
 456 martingale differences again. In particular,  $E\{Z_n(\ell)\} = 0$  for all  $n$ . Thus  $\text{Var}(\sqrt{n}(Z_n(2) -$   
 457  $Z_n(1))) = nE\{(Z_n(2) - Z_n(1))^2\}$ . Observe that:

$$Z_n(1)Z_n(2) = \sum_{j=1}^n \sum_{k=1}^n \sum_{x, y \in S} \frac{\pi(1, x)\pi(2, y)}{\gamma(1, x)\gamma(2, y)} \frac{D_j(1, x)D_k(2, y)}{n}.$$

458 We show that  $E\{D_j(1, x)D_k(2, y)\} = 0$ . If  $j = k$ , then the product  $D_j(1, x)D_j(2, y) = 0$  since  
 459 only one of the two chains  $\ell = 1, 2$  can be run at time  $k$ . If  $j > k$ , then the tower property of  
 460 conditional expectations is applied as usual to give:

$$E\{E\{D_j(1, x)|\mathcal{G}_k\}D_k(2, x)\} = 0.$$

461 The same holds of course if  $j < k$ . Thus we have  $E\{Z_n(1)Z_n(2)\} = 0$  for all  $n$ . Finally, using (71)  
 462 with  $w(1, x) = \pi(1, x)/\gamma(1, x)$  and  $w(2, x) = 0$ , together with the Skorohod representation theorem  
 463 and the bounded convergence theorem, it follows that:

$$E\{nZ_n(1)^2\} \rightarrow \sum_{x \in S} \frac{\pi^2(1, x)\sigma^2(1, x)}{\gamma(1, x)}.$$

464 (Use of bounded convergence here requires assuming boundedness of rewards.) An analogous result  
 465 holds for the limit of  $E\{nZ_n(2)^2\}$ . Combining these steps, we obtain (86).

466 Finally, we can establish the following upper bound:

$$\limsup_{n \rightarrow \infty} n \text{Var}(\hat{\alpha}_n - \alpha_n) \leq \sum_{\ell=1,2} \sum_{x \in S} \frac{\pi^2(\ell, x)\sigma^2(\ell, x)}{\gamma(\ell, x)}. \quad (87)$$

467 To prove this we upper bound the variance of  $Y_n(2) - Y_n(1)$  in terms of the variance of  $Z_n(2) - Z_n(1)$ .  
 468 Note that  $\text{Var}(Y_n(2) - Y_n(1)) \leq E\{(Y_n(2) - Y_n(1))^2\}$ . Further, because  $D_j(\ell, x)$  are bounded,  
 469 there exist constants  $M_1, M_2$  such that:

$$(Y_n(2) - Y_n(1))^2 \leq (Z_n(2) - Z_n(1))^2 + M_1 \sup_{\ell=1,2;x \in S} \left| \frac{\hat{\pi}_n(\ell, x)}{\max\{\Gamma_n(\ell, x), 1\}/n} - \frac{\pi(\ell, x)}{\gamma(\ell, x)} \right|$$

$$+ M_2 \sup_{\ell=1,2;x \in S} \left| \frac{\hat{\pi}_n(\ell, x)}{\max\{\Gamma_n(\ell, x), 1\}/n} - \frac{\pi(\ell, x)}{\gamma(\ell, x)} \right|^2.$$

470 Taking expectations on both sides, and applying Steps 2 and 3, establishes (87). Combining (87) with  
 471 (30) yields the desired result (note that  $E\{\gamma(\ell, x)\} = \gamma(\ell, x)$  since the policy limits are almost surely  
 472 constant). ■

473 **Proof of Theorem 13.** First, we show that (33)-(34) has a unique optimal solution  $\kappa^*$ , with entries  
 474 that are all positive. It is straightforward to see that the solution to this problem will be positive in all  
 475 coordinates, since the objective function approaches infinity as any  $\kappa(\ell, x)$  approaches zero (as all  
 476  $\sigma(\ell, x)$  are positive). Further, note that the objective function is strictly convex and  $\mathcal{K}$  is convex and  
 477 compact, and thus there must be a unique solution  $\kappa^* \in \mathcal{K}$  to the optimization problem (33)-(34).

478 Next, we show that the limit inferior of the scaled asymptotic variance of the MLE under any TAR  
 479 policy with positive policy limits is bounded below by the optimal value of (33)-(34). This follows  
 480 by applying Corollary 10. In particular, from Remark 5, we know  $\gamma$  is a probability measure over the  
 481 set  $\mathcal{K}$  (cf. Definition 3). The set  $\mathcal{K}$  is convex and compact, and so  $\kappa = E\{\gamma\} \in \mathcal{K}$ . In particular, as a  
 482 consequence by applying (30) we conclude that the optimal value of (33)-(34) is a lower bound to  
 483  $\liminf_{n \rightarrow \infty} \text{Var}(\hat{\alpha}_n - \alpha)$ .

484 Finally, the fact that (35) holds follows from Corollary 11. The stationary Markov policy  $A^*$  defined  
 485 via (20) has the constant policy limit  $\kappa^*$  (cf. Remark 5), so it is efficient. The theorem follows. ■

## 486 D Pseudocode for OnlineETI

487 The pseudocode for OnlineETI is presented as Algorithm 1.

## 488 E Proofs: Section 6

489 **Proof of Theorem 14.** We establish that for OnlineETI there holds:

$$\frac{1}{n} \Gamma_n(\ell, x) \xrightarrow{P} \kappa^*(\ell, x), \quad (88)$$

490 where  $\kappa^*$  is the solution to (33)-(34).

491 First, note that the forced exploration (i.e., the  $M_n(x)^{-1/2}$  term in the definition of  $\hat{p}_n(\ell, x)$ ) ensures  
 492 that  $\Gamma_n(\ell, x) \rightarrow \infty$  almost surely for all  $\ell, x$ . To see this, note first that as long as  $M_n(x) \rightarrow \infty$   
 493 almost surely, it must be the case that  $\Gamma_n(\ell, x) \rightarrow \infty$  for  $\ell = 1, 2$  almost surely as well, due to the  
 494 forced exploration term, the fact that  $\sum_{k \geq 1} k^{-1/2}$  diverges, and the Borel-Cantelli Lemma. Since  
 495 the state space is finite, almost surely, there exists at least one state  $x'$  that is visited infinitely often.  
 496 Thus almost surely, all states reachable from  $x'$  in one step under either  $P(1)$  or  $P(2)$  must be visited  
 497 infinitely often as well. The same argument applies to those states, and so on. Since the state space is  
 498 finite, and both  $P(1)$  and  $P(2)$  are irreducible, this process exhausts all the states, and we conclude  
 499  $M_n(x) \rightarrow \infty$  almost surely for all  $x \in S$ .

500 Next we show that for all  $\ell, x, y$ ,  $\hat{P}_n(\ell, x, y)$  converges to  $P(\ell, x, y)$  almost surely. For each  
 501  $\ell, x$ , it is convenient to define  $T_m(\ell, x) = \inf\{n : \Gamma_n(\ell, x) = m\}$ . By the standard strong law  
 502 of large numbers, it follows that  $\hat{P}_{T_m(\ell, x)}(\ell, x, y) \rightarrow P(\ell, x, y)$  almost surely; this is because  
 503  $\hat{P}_{T_m(\ell, x)}(\ell, x, y)$  is the sample average of  $m$  independent Bernoulli random variables, each with  
 504 success probability  $P(\ell, x, y)$ . Now observe that for  $n$  such that  $T_m(\ell, x) \leq n < T_{m+1}(\ell, x)$ ,  
 505  $\hat{P}_n(\ell, x, y) = \hat{P}_{T_m(\ell, x)}(\ell, x, y)$ ; i.e., between successive visits to state  $x$  in which policy  $\ell$  is sampled,  
 506  $\hat{P}_n(\ell, x, y)$  remains constant. It follows therefore that  $\hat{P}_n(\ell, x, y) \rightarrow P(\ell, x, y)$  almost surely as well.

507 We now use a compactness argument analogous to that used to establish (23) to show that  $\hat{\pi}_n(\ell) \rightarrow$   
 508  $\pi(\ell)$  almost surely. Let  $J$  be the first  $n$  at which  $\hat{P}_n(\ell)$  is irreducible for both  $\ell = 1, 2$ . The time  
 509  $J$  is almost surely finite, because both chains are sampled with equal probability until time  $J$ , and  
 510 because  $P(\ell)$  is irreducible for  $\ell = 1, 2$ . Thus for the remainder of our argument, we condition on  
 511 the almost sure event  $J < \infty$ . Next, consider any subsequence  $\{n_k\}$  along which, almost surely,  
 512  $\hat{\pi}_{n_k}(\ell) \rightarrow \pi'(\ell)$ . (Note that in general, this is a random subsequence.) Since  $\hat{\pi}_{n_k}(\ell) \hat{P}_{n_k}(\ell) = \hat{\pi}_{n_k}(\ell)$   
 513 for all  $k$ , almost sure convergence of  $\hat{P}_n(\ell)$  implies that  $\pi'(\ell)P(\ell) = \pi'(\ell)$ . Thus  $\pi'(\ell) = \pi(\ell)$   
 514 almost surely. Since this is almost surely true for every convergent subsequence, we conclude that  
 515  $\hat{\pi}_n(\ell) \rightarrow \pi(\ell)$  almost surely, as required.

---

**Algorithm 1** OnlineETI (Online Experimentation with Temporal Interference)
 

---

```

1: procedure EXPERIMENT(initial state  $x_0$ )
2:   Set initial state  $X_0 = x_0$ 
3:   Initialization: For  $\ell = 1, 2, x, y \in S$ , set  $\hat{P}_0(\ell, x, y) = \frac{1}{|S|}$ ;  $\Gamma_0(\ell, x) = 0$ ;  $\Phi_0(\ell, x, y) = 0$ ;
4:      $\Theta_0(\ell, x) = 0$ ;  $\Psi_0(\ell, x) = 0$ ;  $\Upsilon_0(\ell, x, y) = 0$ ;  $\hat{r}_0(\ell, x) = 0$ ;  $\hat{s}_0(\ell, x, y) = 0$ ;
5:      $\hat{t}_0(\ell, x, y) = 0$ ;  $\hat{\pi}_0(\ell, x) = 0$ ;  $\hat{p}_0(\ell, x) = 0.5$ 
6:   for  $n = 1, 2, \dots$  do
7:     Set  $A_{n-1} = \ell$  with probability  $\hat{p}_{n-1}(\ell, x)$ , i.e.:
8:      $A_{n-1} = 1$  if  $U_{n-1} \leq \hat{p}_{n-1}(1, x)$ , and  $A_{n-1} = 2$  otherwise
9:     Run chain  $A_{n-1}$ , and obtain reward  $R_n$  and new state  $X_n$ 
10:    For all  $\ell = 1, 2, x, y \in S$ :
11:       $\Gamma_n(\ell, x) \leftarrow \Gamma_{n-1}(\ell, x) + I(X_{n-1} = x, A_{n-1} = \ell)$ 
12:       $\Phi_n(\ell, x, y) \leftarrow \Phi_{n-1}(\ell, x, y) + I(X_{n-1} = x, X_n = y, A_{n-1} = \ell)$ 
13:       $\Theta_n(\ell, x) \leftarrow \Theta_{n-1}(\ell, x) + I(X_{n-1} = x, A_{n-1} = \ell)R_n$ 
14:       $\Psi_n(\ell, x, y) \leftarrow \Psi_{n-1}(\ell, x, y) + I(X_{n-1} = x, X_n = y, A_{n-1} = \ell)R_n$ 
15:       $\Upsilon_n(\ell, x, y) \leftarrow \Upsilon_{n-1}(\ell, x, y) + I(X_{n-1} = x, X_n = y, A_{n-1} = \ell)R_n^2$ 
16:       $\hat{P}_n(\ell, x, y) \leftarrow \frac{\Phi_n(\ell, x, y)}{\max\{\Gamma_n(\ell, x), 1\}}$ 
17:    if for both  $\ell = 1, 2$ ,  $\hat{P}_n(\ell)$  is irreducible then
18:      Set  $\hat{\pi}_n(\ell)$  to be the unique steady state distribution of  $\hat{P}_n(\ell)$ 
19:      For  $\ell = 1, 2$  and  $x, y \in S$ :
20:         $\hat{\Pi}_n(\ell) \leftarrow e^{\hat{\pi}_n(\ell)}$ 
21:         $\hat{g}_n(\ell, x) \leftarrow (I - \hat{P}_n(\ell) + \hat{\Pi}_n(\ell))^{-1} \hat{r}_n(\ell)$ 
22:         $\hat{r}_n(\ell, x) \leftarrow \frac{\sum_{y \in S} \Psi_n(\ell, x, y)}{\max\{\Gamma_n(\ell, x), 1\}}$ 
23:         $\hat{s}_n(\ell, x, y) \leftarrow \frac{\Psi_n(\ell, x, y)}{\max\{\Phi_n(\ell, x, y), 1\}}$ 
24:         $\hat{t}_n(\ell, x, y) \leftarrow \frac{\Upsilon_n(\ell, x, y)}{\max\{\Phi_n(\ell, x, y), 1\}}$ 
25:         $\hat{\sigma}_n^2(\ell, x) \leftarrow \sum_{y \in S} \hat{P}_n(\ell, x, y) [\hat{g}_n(\ell, y) - \sum_{z \in S} \hat{P}_n(\ell, x, z) \hat{g}_n(\ell, z)]^2$ 
26:         $+ \sum_{y \in S} \hat{P}_n(\ell, x, y) (\hat{t}_n(\ell, x, y) - \hat{s}_n(\ell, x, y)^2)$ 
27:        Choose any  $\hat{\kappa}_n$  in  $\arg \inf_{\hat{\kappa} \in \mathcal{K}} \sum_{\ell=1}^2 \sum_{x \in S} \frac{\hat{\pi}_n^2(\ell, x) \hat{\sigma}_n^2(\ell, x)}{\hat{\kappa}_n(\ell, x)}$ 
28:        For all  $x \in S$ ,  $M_n(x) \leftarrow \Gamma_n(1, x) + \Gamma_n(2, x)$ 
29:        if  $\hat{\kappa}_n(1, x) + \hat{\kappa}_n(2, x) > 0$  and  $M_n(x) > 0$  then
30:           $\hat{p}_n(\ell, x) \leftarrow (1 - M_n(x)^{-1/2}) \left( \frac{\hat{\kappa}_n(\ell, x)}{\hat{\kappa}_n(1, x) + \hat{\kappa}_n(2, x)} \right)$ 
31:           $+ \frac{1}{2} M_n(x)^{-1/2}$  for  $\ell = 1, 2, x \in S$ 
32:        else
33:           $\hat{p}_n(\ell, x) = 0.5$  for  $\ell = 1, 2, x \in S$ 
34:           $\hat{\alpha}_n \leftarrow \hat{\pi}_n(2) \hat{r}_n(2) - \hat{\pi}_n(1) \hat{r}_n(1)$ 
35:        else
36:           $\hat{p}_n(\ell, x) \leftarrow 0.5$ 
37:           $\hat{\alpha}_n \leftarrow 0$ 

```

---

516 Because rewards are bounded, and thus in particular have finite moments, an argument analogous to  
 517 that above for  $\hat{P}_n$  establishes that almost surely we have:

$$\hat{r}_n(\ell, x) \rightarrow r(\ell, x)$$

518 and

$$\hat{t}_n(\ell, x, y) - \hat{s}_n^2(\ell, x, y)^2 \rightarrow \text{Var}(R_1 | A_0 = \ell, X_0 = x, X_1 = y).$$

519 When  $J < \infty$ , since each  $\hat{P}_n(\ell)$  is irreducible, it follows that  $(I - \hat{P}_n(\ell) + \hat{\Pi}_n(\ell))^{-1}$  exists. By  
 520 continuity, conditioning on  $J < \infty$ , we have:

$$\hat{g}_n(\ell, x) \rightarrow \tilde{g}(\ell, x)$$

521 almost surely as well, and thus:

$$\hat{\sigma}_n^2(\ell, x) \rightarrow \sigma^2(\ell, x)$$



522 almost surely.

523 We now establish almost sure convergence of  $\hat{\kappa}_n$  to  $\kappa^*$ . To do this, for a distribution  $\tilde{\pi}$  on the state  
 524 space  $S$  and a nonnegative vector  $\tilde{\sigma}$ , define the correspondence  $K(\tilde{\pi}, \tilde{\sigma})$  to be the set of minimizers of  
 525  $\sum_{\ell=1,2} \sum_{x \in S} \tilde{\pi}^2(\ell, x) \tilde{\sigma}^2(\ell, x) / \kappa(\ell, x)$  over  $\kappa \in \mathcal{K}$ ; recall that  $\mathcal{K}$  is compact so this correspondence  
 526 is nonempty everywhere. Further, observe that if  $\tilde{\pi}$  and  $\tilde{\sigma}$  are positive in all coordinates, then the  
 527 minimizer is unique, i.e.,  $K$  is a function. Then by Lemma 15 below,  $K$  is continuous in  $\tilde{\pi}$  and  $\tilde{\sigma}$   
 528 when they are both positive in all coordinates. Since  $\hat{\pi}_n(\ell) \rightarrow \pi(\ell)$  and  $\hat{\sigma}_n^2(\ell, x) \rightarrow \sigma^2(\ell, x)$  almost  
 529 surely, and both limits are positive in all coordinates, it follows that  $K(\hat{\pi}_n, \hat{\sigma}_n) \rightarrow K(\pi, \sigma) = \kappa^*$   
 530 almost surely, and thus  $\hat{\kappa}_n \rightarrow \kappa^*$  almost surely.

531 In particular, we thus know that almost surely,  $\hat{\kappa}_n(\ell, x) > 0$  for all sufficiently large  $n$ . As a result, it  
 532 follows that  $\hat{p}_n(\ell, x) \rightarrow p^*(\ell, x)$  almost surely, where:

$$p^*(\ell, x) = \frac{\kappa^*(\ell, x)}{\kappa^*(1, x) + \kappa^*(2, x)}.$$

533 To complete the proof, we require some additional notation. We define the following stochastic  
 534 matrix:

$$Q(x, y) = p^*(1, x)P(1, x, y) + p^*(2, x)P(2, x, y).$$

535 Note that this matrix is irreducible, and because  $\kappa^* \in \mathcal{K}$ , we can easily see that  $Q$  has the unique  
 536 stationary distribution given by:

$$\zeta^*(x) = \kappa^*(1, x) + \kappa^*(2, x).$$

537 (See also the discussion in Remark 5.)

538 In addition, we define:

$$\hat{Q}_n(x, y) = \frac{\sum_{j=1}^n I(X_{j-1} = x, X_j = y)}{\max\{M_n(x), 1\}}.$$

539 Observe that  $\hat{Q}_n$  is a stochastic matrix.

540 We now show that  $\hat{Q}_n \xrightarrow{p} Q$ . We rewrite  $\hat{Q}_n(x, y)$  as follows:

$$\hat{Q}_n(x, y) = \sum_{\ell=1,2} \hat{P}_n(\ell, x, y) \cdot \frac{\sum_{j=1}^n I(X_{j-1} = x, A_{j-1} = \ell)}{\max\{M_n(x), 1\}}. \quad (89)$$

541 For each  $x$  and  $m$ , let  $S_m(x) = \inf\{n \geq 0 : M_n(x) = m\}$ ; this is the time step at which the  $m$ 'th  
 542 visit to  $x$  takes place. Further, define  $\tilde{A}_m = A_{S_m(x)}$ ; this is the policy sampled at the  $m$ 'th visit to  $x$ .  
 543 Let  $\mathcal{H}_m(x) = \sigma((X_j, U_j, V_j, j < S_m(x); X_{S_m(x)}))$  be the sigma field generated by randomness up  
 544 to the  $m$ 'th visit to  $x$ , but prior to the policy being chosen. Finally, let  $\hat{q}_m(\ell, x) = \hat{p}_{S_m(x)}(\ell, x)$ . Now  
 545 observe that when  $M_n(x) = m \geq 1$ , we have:

$$\begin{aligned} \frac{\sum_{j=1}^n I(X_{j-1} = x, A_{j-1} = \ell)}{\max\{M_n(x), 1\}} &= \frac{\sum_{i=1}^m I(\tilde{A}_i = \ell)}{m} \\ &= \frac{\sum_{i=1}^m I(\tilde{A}_i = \ell) - \hat{q}_i(\ell, x)}{m} + \frac{\sum_{i=1}^m \hat{q}_i(\ell, x)}{m}. \end{aligned}$$

546 The terms in the first sum on the right hand side of the previous expression form a martingale  
 547 difference sequence adapted to  $\mathcal{H}_i$ . Thus using orthogonality of martingale differences, we have:

$$\frac{1}{m^2} E \left\{ \left( \sum_{i=1}^m I(\tilde{A}_i = \ell) - \hat{q}_i(\ell, x) \right)^2 \right\} \leq \frac{1}{4m},$$

548 which approaches zero as  $m \rightarrow \infty$ . By Chebyshev's inequality, it follows that:

$$\frac{\sum_{i=1}^m I(\tilde{A}_i = \ell) - \hat{q}_i(\ell, x)}{m} \xrightarrow{p} 0$$

549 as  $m \rightarrow \infty$ . On the other hand, note that since  $M_n(x) \rightarrow \infty$  almost surely, we also know that  
 550  $S_m(x) \rightarrow \infty$  as  $m \rightarrow \infty$  almost surely. Thus it follows that:

$$\frac{\sum_{i=1}^m \hat{q}_i(\ell, x)}{m} \rightarrow p^*(\ell, x)$$

551 almost surely as  $m \rightarrow \infty$ , and thus in probability as well. Combining these insights, we conclude  
 552 that:

$$\frac{\sum_{j=1}^n I(X_{j-1} = x, A_{j-1} = \ell)}{\max\{M_n(x), 1\}} \xrightarrow{p} p^*(\ell, x)$$

553 as  $n \rightarrow \infty$ , and so returning to (89), we find that:

$$\hat{Q}_n(x, y) \xrightarrow{p} \sum_{\ell=1,2} p^*(\ell, x) P(\ell, x, y) = Q(x, y).$$

554 Next, observe that:

$$\begin{aligned} \frac{M_n(x)}{n} &= \frac{\sum_{j=1}^n I(X_j = x)}{n} + \frac{I(X_0 = x) - I(X_n = x)}{n} \\ &= \left( \sum_{y \in S} \hat{Q}_n(x, y) \cdot \frac{\max\{M_n(y), 1\}}{n} \right) + O_p\left(\frac{1}{n}\right). \end{aligned}$$

555 Since  $M_n(x) \rightarrow \infty$  almost surely, in what follows we condition on  $M_n(x) \geq 1$  for all  $x$  and  
 556 thus ignore the ‘‘max’’ on the right hand side in the preceding expression. Note that for all  $n$ ,  
 557  $\sum_{x \in S} M_n(x) = n$ . Thus using a compactness argument analogous to that used to establish (23), it  
 558 follows that:

$$\frac{M_n(n)}{n} \xrightarrow{p} \zeta^*(x).$$

559 We can now complete the proof of the theorem. We have:

$$\begin{aligned} \frac{1}{n} \Gamma_n(\ell, x) &= \frac{1}{n} \sum_{j=0}^{n-1} I(X_j = x, A_j = \ell) \\ &= \frac{1}{n} \sum_{j=0}^{n-1} I(X_j = x) p^*(\ell, x) + \frac{1}{n} \sum_{j=0}^{n-1} I(X_j = x) (\hat{p}_j(\ell, x) - p^*(\ell, x)) \\ &\quad + \frac{1}{n} \sum_{j=0}^{n-1} I(X_j = x) (I(A_j = \ell) - \hat{p}_j(\ell, x)) \end{aligned} \tag{90}$$

560 Because  $I(X_j = x)(I(A_j = \ell) - \hat{p}_j(\ell, x))$  is a martingale difference measurable with respect to  $\mathcal{G}_j$ ,  
 561 orthogonality of martingale differences implies that

$$E \left\{ \left( \frac{1}{n} \sum_{j=1}^n I(X_j = x) (I(A_j = \ell) - \hat{p}_j(\ell, x)) \right)^2 \right\} \tag{91}$$

$$\leq E \left\{ \frac{1}{4} \cdot \frac{1}{n^2} \Gamma_n(\ell, x) \right\} \leq \frac{1}{4n} \tag{92}$$

$$\rightarrow 0 \tag{93}$$

562 as  $n \rightarrow \infty$ . Therefore, by Chebyshev’s inequality

$$\frac{1}{n} \sum_{j=0}^{n-1} I(X_j = x) (I(A_j = \ell) - \hat{p}_j(\ell, x)) \xrightarrow{p} 0 \tag{94}$$

563 as  $n \rightarrow \infty$ . Also, since  $\hat{p}_n(\ell, x) \rightarrow p^*(\ell, x)$  almost surely, we have:

$$\frac{1}{n} \sum_{j=0}^{n-1} I(X_j = x) (\hat{p}_j(\ell, x) - p^*(\ell, x)) \xrightarrow{p} 0. \tag{95}$$

564 Finally,

$$\frac{1}{n} \sum_{j=0}^{n-1} I(X_j = x) p^*(\ell, x) = \frac{p^*(\ell, x) M_n(\ell, x)}{n} \xrightarrow{P} p^*(\ell, x) \zeta^*(\ell, x).$$

565 Combining the preceding results, we conclude that as  $n \rightarrow \infty$  in (90), we have

$$\frac{1}{n} \Gamma_n(\ell, x) \xrightarrow{P} \zeta^*(\ell, x) p^*(\ell, x) = \kappa^*(\ell, x) \quad (96)$$

566 as  $n \rightarrow \infty$ , completing the proof of the theorem. ■

567 **Lemma 15** *Suppose that the set  $X$  is compact, the set  $\Theta$  is open, and the real-valued function  $f(\theta, x)$*   
568 *is continuous on the domain  $\Theta \times X$ . Suppose further that for every  $\theta \in \Theta$ , there exists a unique*  
569  *$x^*(\theta) = \arg \min_{x \in X} f(\theta, x)$ . Then  $x^*(\theta)$  is continuous in  $\theta$ .*

570 **Proof.** Suppose that  $\theta^{(n)} \rightarrow \theta$ . For all  $n$  we have:

$$f(\theta^{(n)}, x^*(\theta^{(n)})) \leq f(\theta^{(n)}, x^*(\theta)). \quad (97)$$

571 Since  $X$  is compact, let  $\{n_k\}$  be a subsequence such that  $x^*(\theta^{(n_k)}) \rightarrow x'$  as  $k \rightarrow \infty$ . Taking limits  
572 on both sides of (97) along the sequence  $\{n_k\}$ , we obtain:

$$f(\theta, x') \leq f(\theta, x^*(\theta)).$$

573 Since  $x^*(\theta)$  is unique, this is only possible if  $x' = x^*(\theta)$ . Since every convergent subsequence must  
574 have the limit  $x'$ , we conclude that  $x^*(\theta^{(n)}) \rightarrow x^*(\theta)$  as  $n \rightarrow \infty$ , as required. ■
